# Supplementary material for: An eco-friendly nitrate-free method for the synthesis of silver nanowires with reduced diameters
Source: Royal Society of Chemistry journal article supplement (doi:10.1039/d0tc05149g), 2020-12-18
Supplement: d0tc05149g1.pdf [file d0tc05149g1.pdf]

# An Eco-Friendly Nitrate-Free Method for the Synthesis of Silver Nanowires with Reduced Diameters

*Wei Zhao,<sup>a,b†</sup> Sha-Sha Wang,<sup>a†\*</sup> Chun-Bao Zhao,<sup>b</sup> Hong-Tao Cao,<sup>a</sup> He Zhang,<sup>a</sup> Ai-Zhong Peng<sup>a</sup>, Hong-jin Dong,<sup>b</sup> Ling-Hai Xie,<sup>a\*</sup> and Wei Huang<sup>a,c</sup>*

a. Centre for Molecular Systems and Organic Devices (CMSOD), Key Laboratory for Organic Electronics and Information Displays and Jiangsu Key Laboratory for Biosensors, Institute of Advanced Materials (IAM), Jiangsu National Synergetic Innovation Center for Advanced Materials (SICAM), Nanjing University of Posts & Telecommunications(NJUPT), 9 Wenyuan Road, Nanjing 210023, China

b. Nanjing Vocational College of Information Technology(NJCIT), 99 Wenlan Road, Nanjing 210023, China

c. Frontiers Science Center for Flexible Electronics, Xi'an Institute of Flexible Electronics (IFE) and Xi'an Institute of Biomedical Materials & Engineering, Northwestern Polytechnical University (NPU), 127 West Youyi Road, Xi'an 710072, Shaanxi, China

† These authors contributed equally to this work.

## Supporting Information

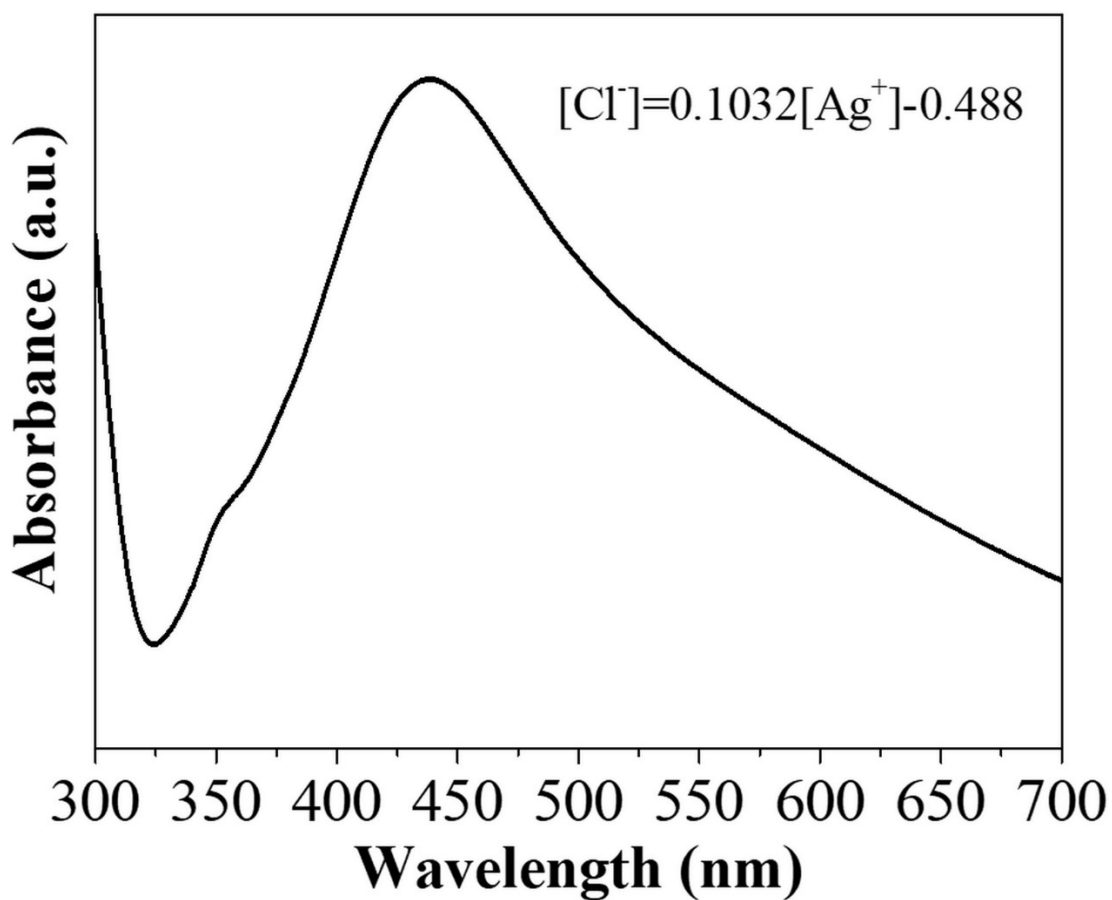

**Figure S1.** UV-vis absorption spectrum of Ag NWs synthesized by AgOAc precursor with trace Cl<sup>-</sup> as the normal hydrothermal method reported before.<sup>R1</sup> No characteristic peaks of Ag NWs was found.

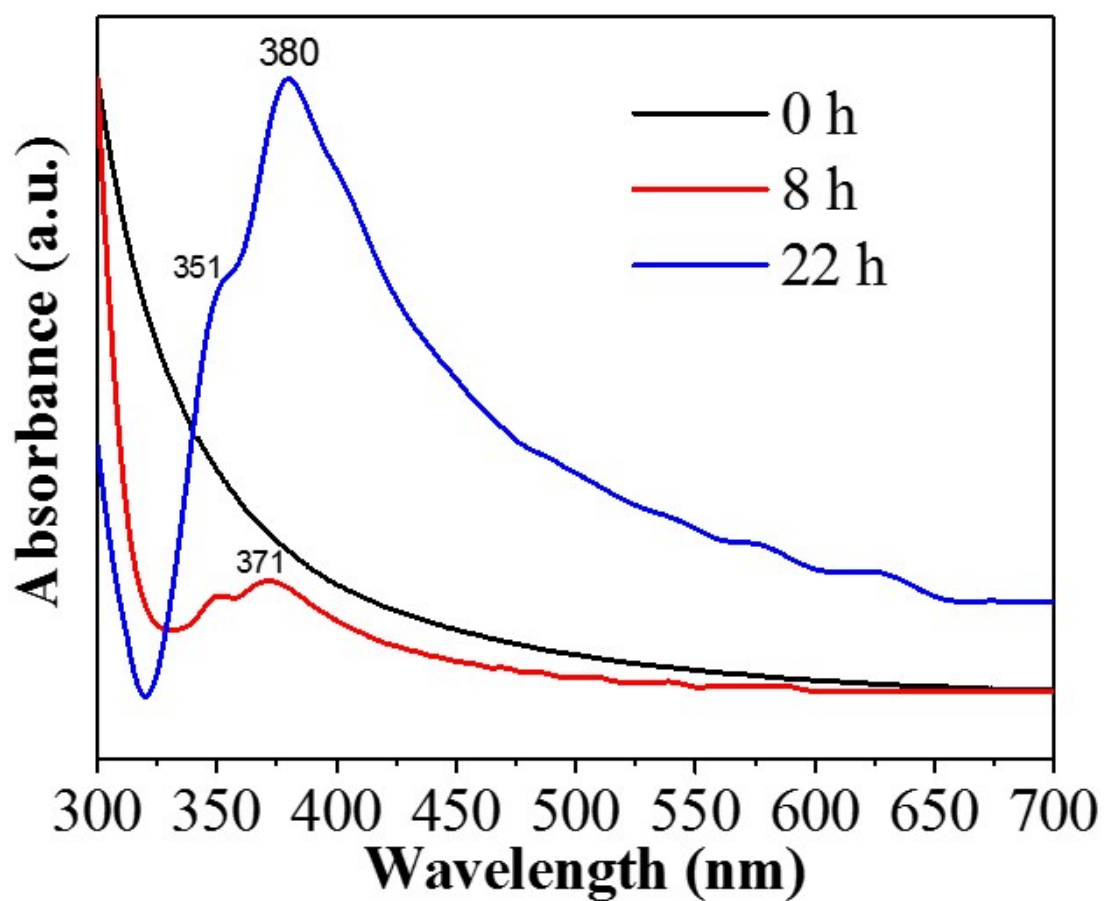

**Figure S2.** UV-vis absorption spectra of the Ag NWs synthesized by AgNO<sub>3</sub> precursor for different reaction times. The red-shift of the characteristic peaks of Ag NWs from 371 to 380nm proved thicker Ag NWs with longer reaction time.

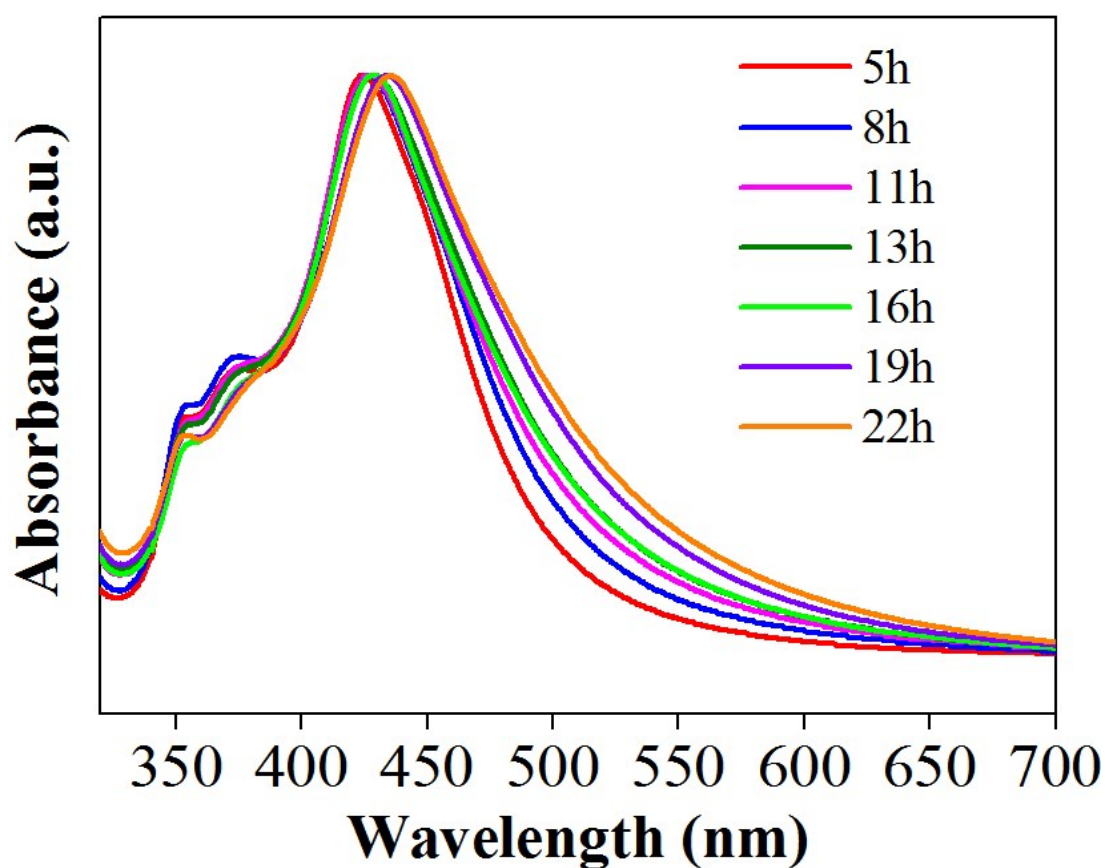

**Figure S3.** UV-vis absorption spectra of the Ag NWs synthesized by typical AgOAc progress, but the reacting autoclave opened in air many times while taking samples at different time intervals as illustrated above. The missing of the characteristic peaks of Ag NWs proves few Ag NWs in the final products.

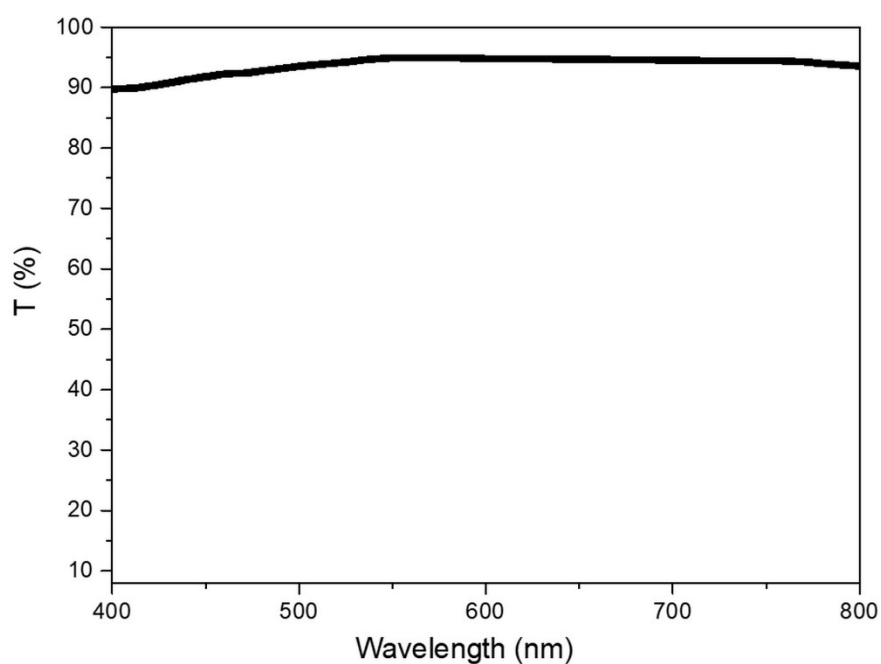

**Figure S4.** Vis-transmittance spectra of the Ag NWs film of 100 Ω/sq

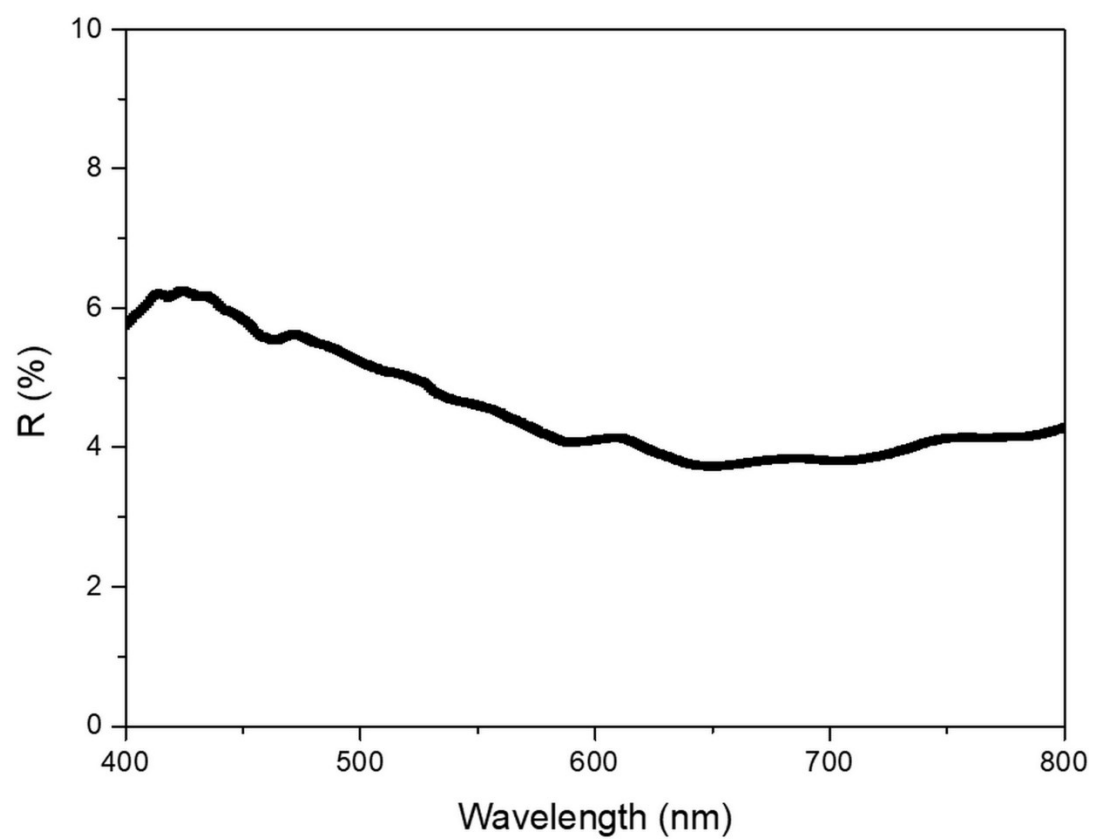

**Figure S5.** Reflection spectra of the Ag NWs film of 100  $\Omega/\text{sq}$
